# Supplementary material
Source: publisher figshare collection journal article supplement (https://sage.figshare.com/ndownloader/files/23117090)
Supplement: Supplementary file 1 [file 23117090]

## Appendix A Coding Sheet

### Video Demographics

Post Date  
Video Length  
Number of Views  
Number of Likes  
Number of Dislikes  
Number of Comments  
Trigger Warning Y/N

### Video Type

Monologue  
Mixed Media  
Dyad

### Motivation

Understand Me/My Story (misunderstood, personal narrative)  
Educate others (stigma reduction, personal narrative)  
Support Others (not alone)

### DSM-5 Criteria

Fear of abandonment Y/N  
Unstable relationships (idealization, devaluation) Y/N  
Identity disturbance Y/N  
Impulsivity (self-damaging) Y/N  
Suicidal Ideations/Behaviours Y/N  
Self Harm Y/N  
Affective instability (marked reactivity of mood) Y/N  
Chronic feelings of emptiness Y/N  
Intense anger Y/N  
Transient dissociation and/or paranoid ideation Y/N

### Treatment

Hospitalization Y/N  
Physician/Psychiatrist/Therapist Y/N  
DBT/CBT/psychotherapy Y/N  
Medication Y/N  
Other Y/N  
Not stated Y/N

### Attitude Towards Treatment

Positive Y/N  
Negative Y/N  
Mixed (positive and negative)  
Not stated Y/N

### Self-Care

DBT strategies Y/N  
Mindfulness/Meditation Y/N  
Yoga/Exercise Y/N  
Positive Thinking/Perspective taking Y/N  
Friends/Family/Supportive others Y/N  
Vlogging Y/N  
Other Y/N

### Future Orientation

Hopeful Y/N  
Hopelessness Y/N  
Not stated Y/N
